# Supplementary material
Source: PubMed Central journal article supplement (PMC4557798)
Supplement: NIHMS536761-supplement-supp_fig_1.pdf [file NIHMS536761-supplement-supp_fig_1.pdf]

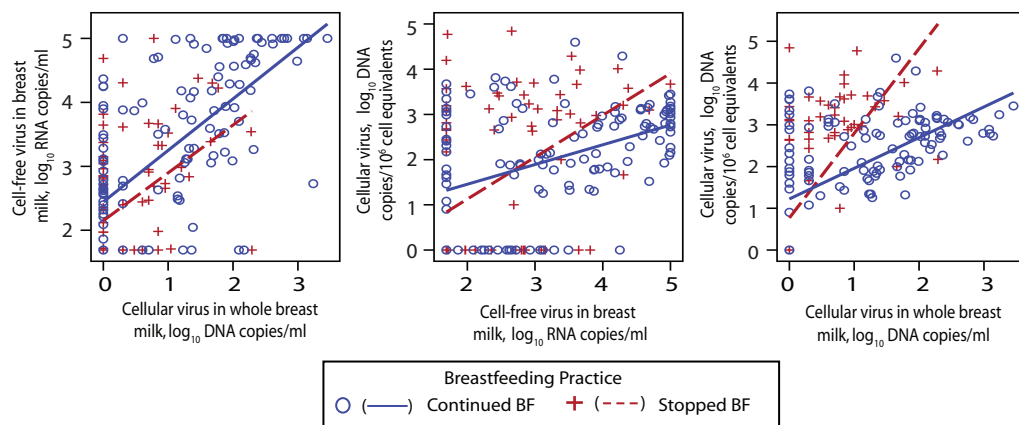

|                                                                      | Continued Breastfeeding                                              |                                                                               | Stopped Breastfeeding                                                |                                                                               |
|----------------------------------------------------------------------|----------------------------------------------------------------------|-------------------------------------------------------------------------------|----------------------------------------------------------------------|-------------------------------------------------------------------------------|
| <b>Spearman Coefficient</b>                                          | Cellular virus in whole breast milk, log <sub>10</sub> DNA copies/ml | Cellular virus, log <sub>10</sub> DNA copies/10 <sup>6</sup> cell equivalents | Cellular virus in whole breast milk, log <sub>10</sub> DNA copies/ml | Cellular virus, log <sub>10</sub> DNA copies/10 <sup>6</sup> cell equivalents |
| <b>p-value</b>                                                       |                                                                      |                                                                               |                                                                      |                                                                               |
| N                                                                    | 86                                                                   | 86                                                                            | 129                                                                  | 129                                                                           |
| Cell-free virus in breast milk, log <sub>10</sub> RNA copies/ml      | 0.49<br><0.0001                                                      | 0.53<br><0.0001                                                               | 0.67<br><0.0001                                                      | 0.39<br><0.0001                                                               |
| N                                                                    |                                                                      | 87                                                                            |                                                                      | 132                                                                           |
| Cellular virus in whole breast milk, log <sub>10</sub> DNA copies/ml |                                                                      | 0.80*<br><0.0001                                                              |                                                                      | 0.58*<br><0.0001                                                              |

\*p<0.0001 for test of interaction with weaning

Fig. S1. Scatter plots showing associations between breast milk HIV-1 RNA concentrations in copies/ml, HIV-1 DNA concentration in copies/ml and HIV-1 DNA concentration in copies per 1 million cell equivalents (1M) stratified by feeding practice at 4.5 months
