# Supplementary material
Source: PubMed Central journal article supplement (PMC4557798)

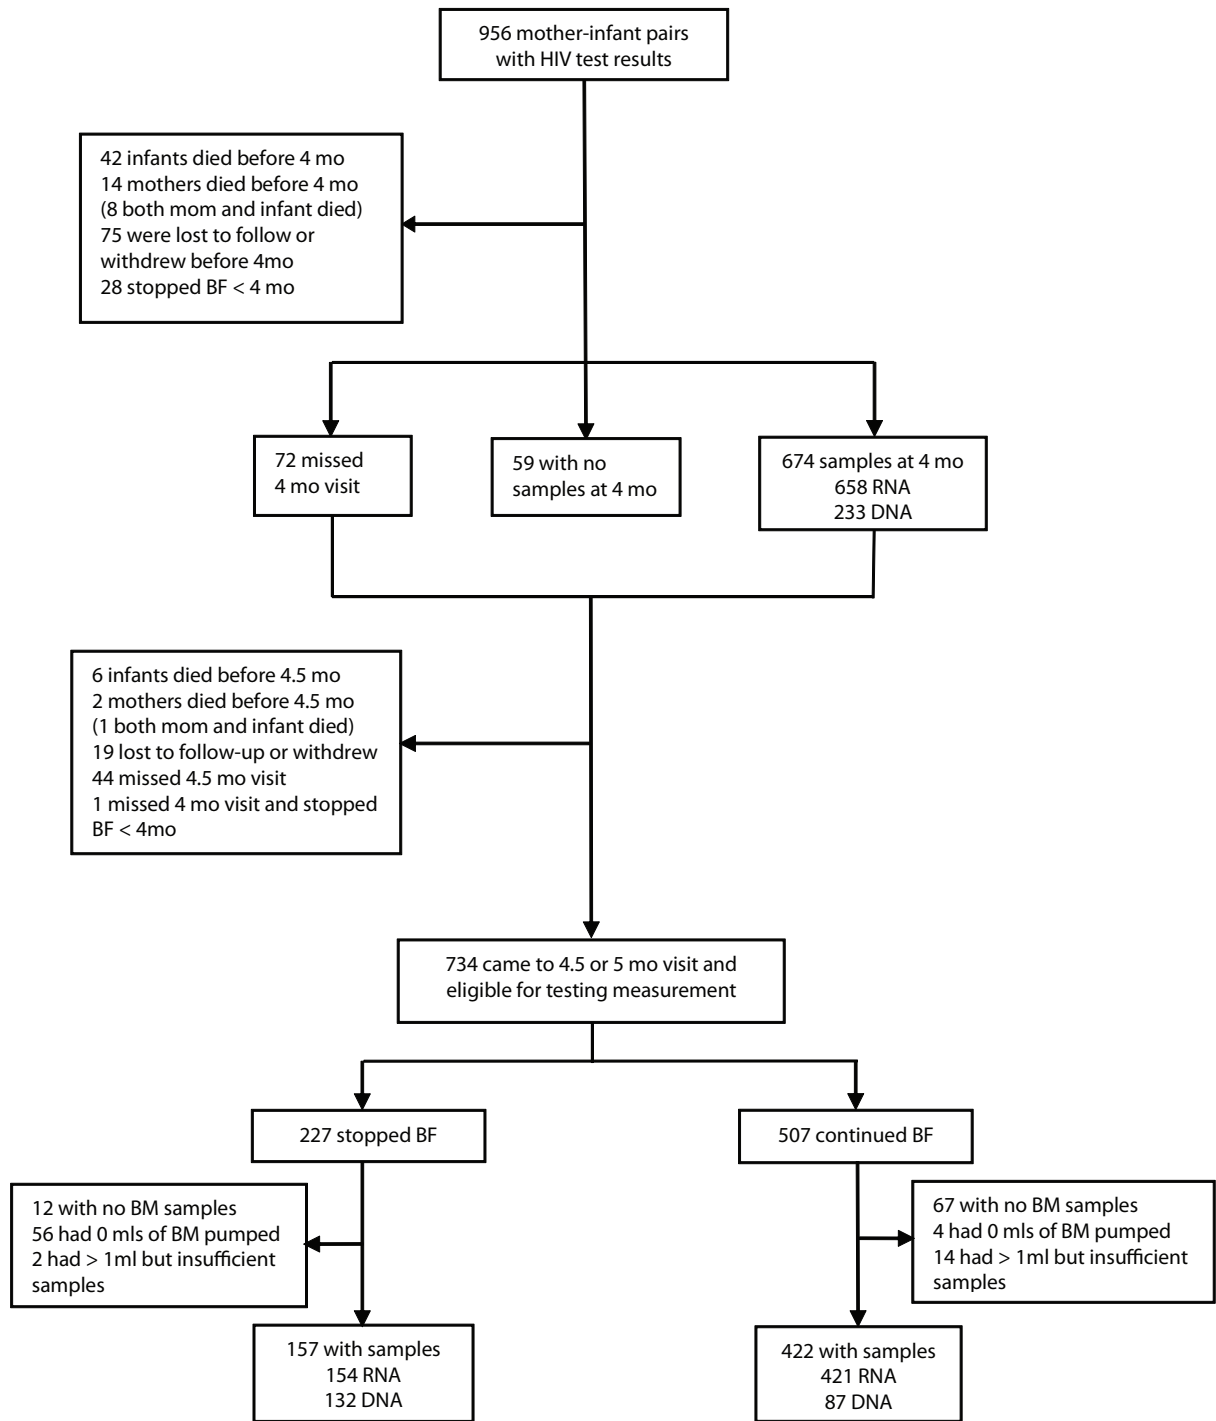

Fig. S2. Flowchart of HIV-infected women who had breast milk HIV measurements

Supplement: NIHMS536761-supplement-supp_fig_2.pdf [file NIHMS536761-supplement-supp_fig_2.pdf]
